# Supplementary material for: New BODIPY chromophores bound to polyhedral oligomeric silsesquioxanes (POSS) with improved thermo- and photostability
Source: Royal Society of Chemistry journal article supplement (doi:10.1039/c1jm11261a), 2011-01-01
Supplement: c1jm11261a.pdf [file c1jm11261a.pdf]

## Supplementary Information

New BODIPY chromophores bound to polyhedral oligomeric silsesquioxanes (POSS) with improved thermo- and photostability

# New BODIPY chromophores bound to polyhedral oligomeric silsesquioxanes (POSS) with improved thermo- and photostability

Marta Liras,<sup>\*a,b</sup> Mercedes Pintado-Sierra,<sup>b,c</sup> Francisco Amat-Guerri<sup>b</sup> and Roberto Sastre<sup>a</sup>

<sup>a</sup> Instituto de Ciencia y Tecnología de Polímeros, ICTP-CSIC, Juan de la Cierva 3, E-28006 Madrid, Spain Fax: (+34) 915644853

e-mail: martaliras@ictp.csic.es

<sup>b</sup> Instituto de Química Orgánica General, IQOG-CSIC, Juan de la Cierva 3, E-28006, Madrid, Spain

<sup>c</sup> Instituto de Química Física Rocasolano, IQFR-CSIC Serrano 119, CSIC, E-28006, Madrid, Spain

## Index

|                                 |    |
|---------------------------------|----|
| Characterization of POSS1 ..... | S2 |
| Characterization of POSS2 ..... | S4 |
| Characterization of POSS3 ..... | S6 |
| Characterization of POSS4 ..... | S8 |

(<sup>1</sup>H-NMR, <sup>13</sup>C-NMR and HRMS MALDI-TOF)

## Supplementary Information

New BODIPY chromophores bound to polyhedral oligomeric silsesquioxanes (POSS) with improved thermo- and photostability

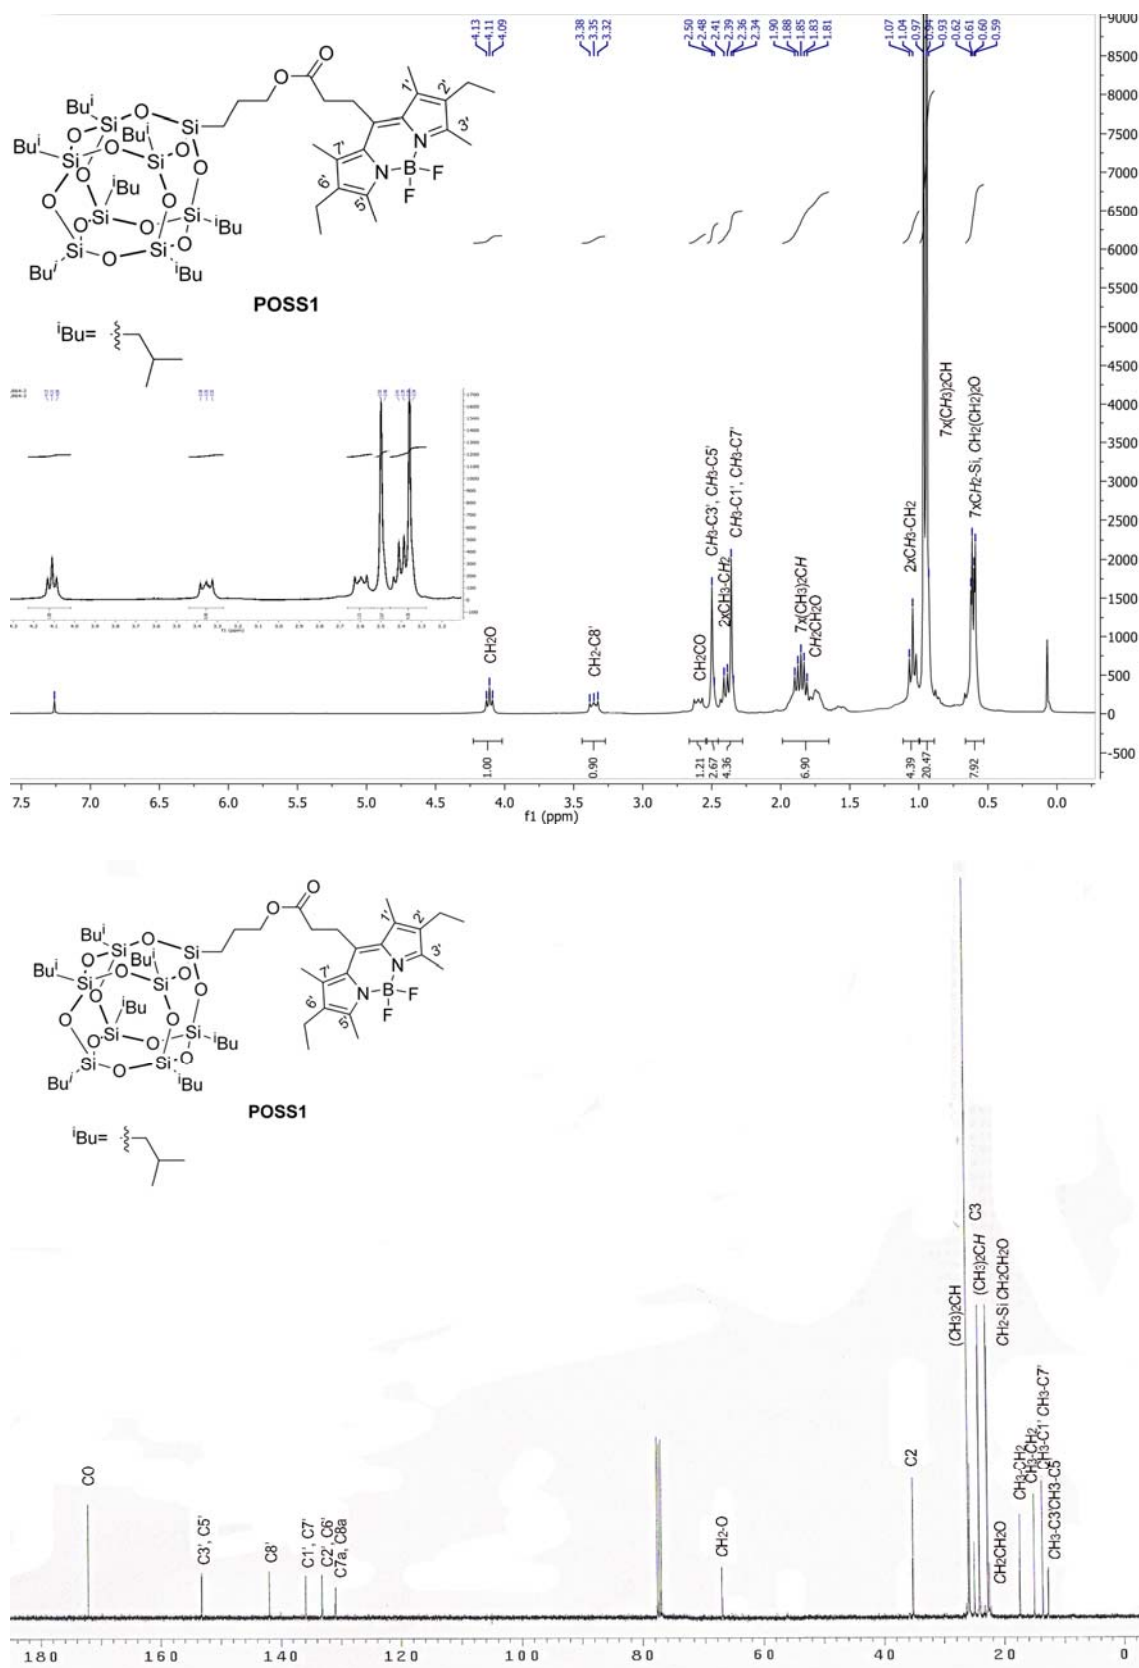

Figure S1. <sup>1</sup>H-NMR and <sup>13</sup>C-NMR spectra of hybrid compound POSS1

## Supplementary Information

### New BODIPY chromophores bound to polyhedral oligomeric silsesquioxanes (POSS) with improved thermo- and photostability

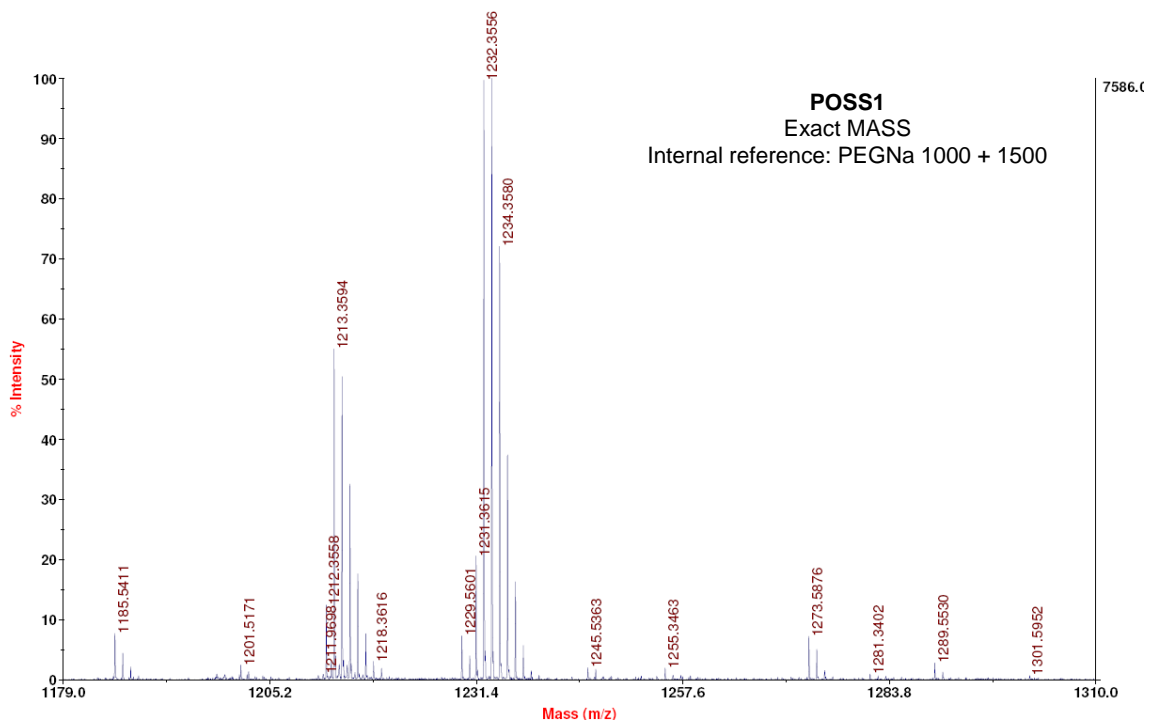

**Figure S2.** POSS1 HRMS MALDI-TOF analysis: calculated for  $C_{51}H_{95}BN_2O_{14}F_2Si_8$  1232.4993, found 1232.355

## Supplementary Information

New BODIPY chromophores bound to polyhedral oligomeric silsesquioxanes (POSS) with improved thermo- and photostability

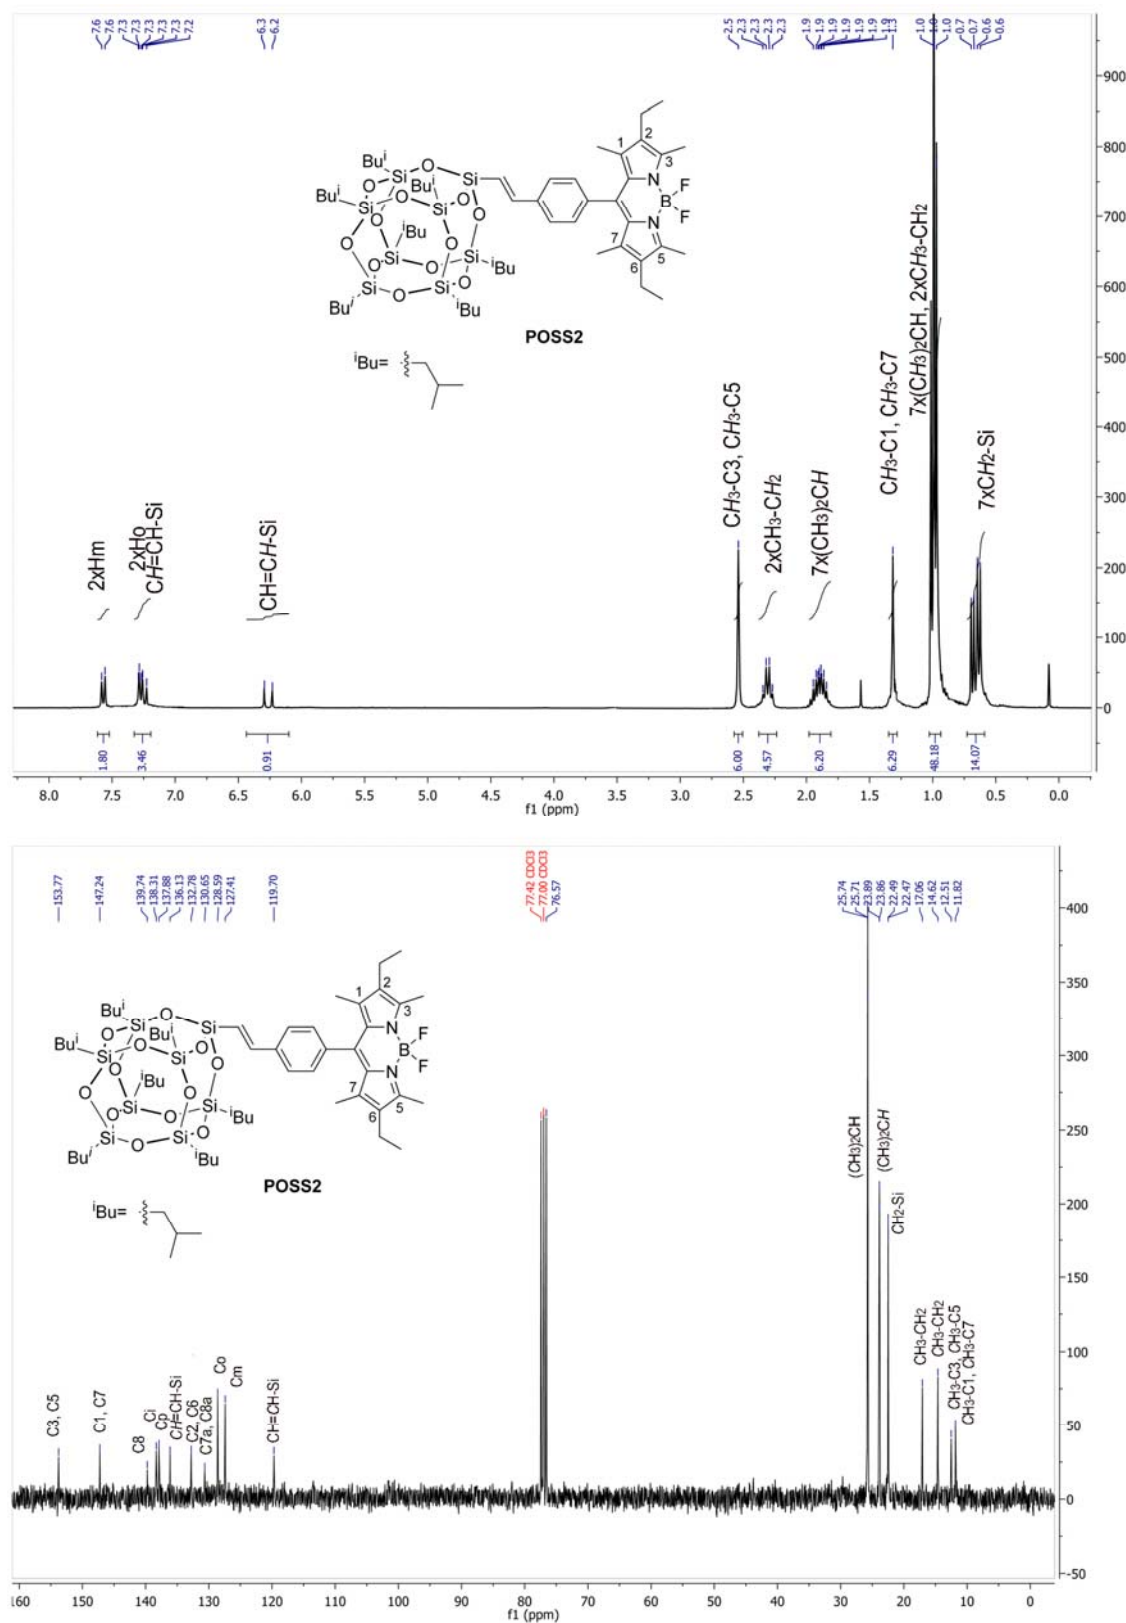

Figure S3. <sup>1</sup>H-NMR and <sup>13</sup>C-NMR spectra of hybrid compound POSS2

## Supplementary Information

New BODIPY chromophores bound to polyhedral oligomeric silsesquioxanes (POSS) with improved thermo- and photostability

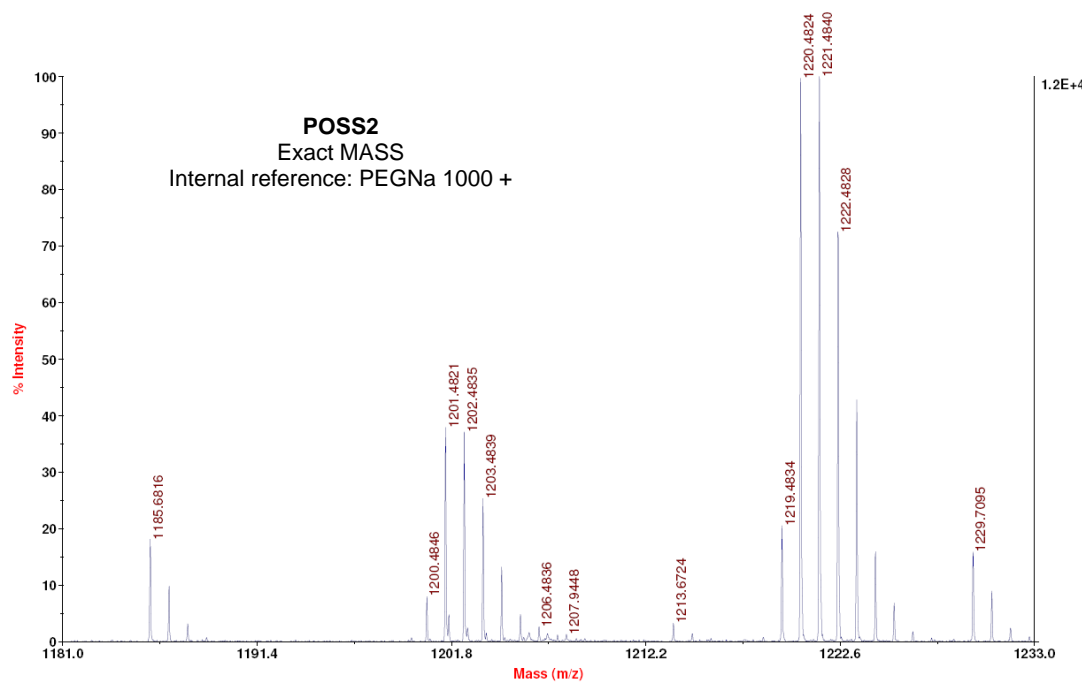

**Figure S4.** POSS2 HRMS MALDI-TOF analysis: calculated for  $C_{53}H_{91}BN_2O_{12}F_2Si_8$  1220.4782, found 1220.4824.

## Supplementary Information

New BODIPY chromophores bound to polyhedral oligomeric silsesquioxanes (POSS) with improved thermo- and photostability

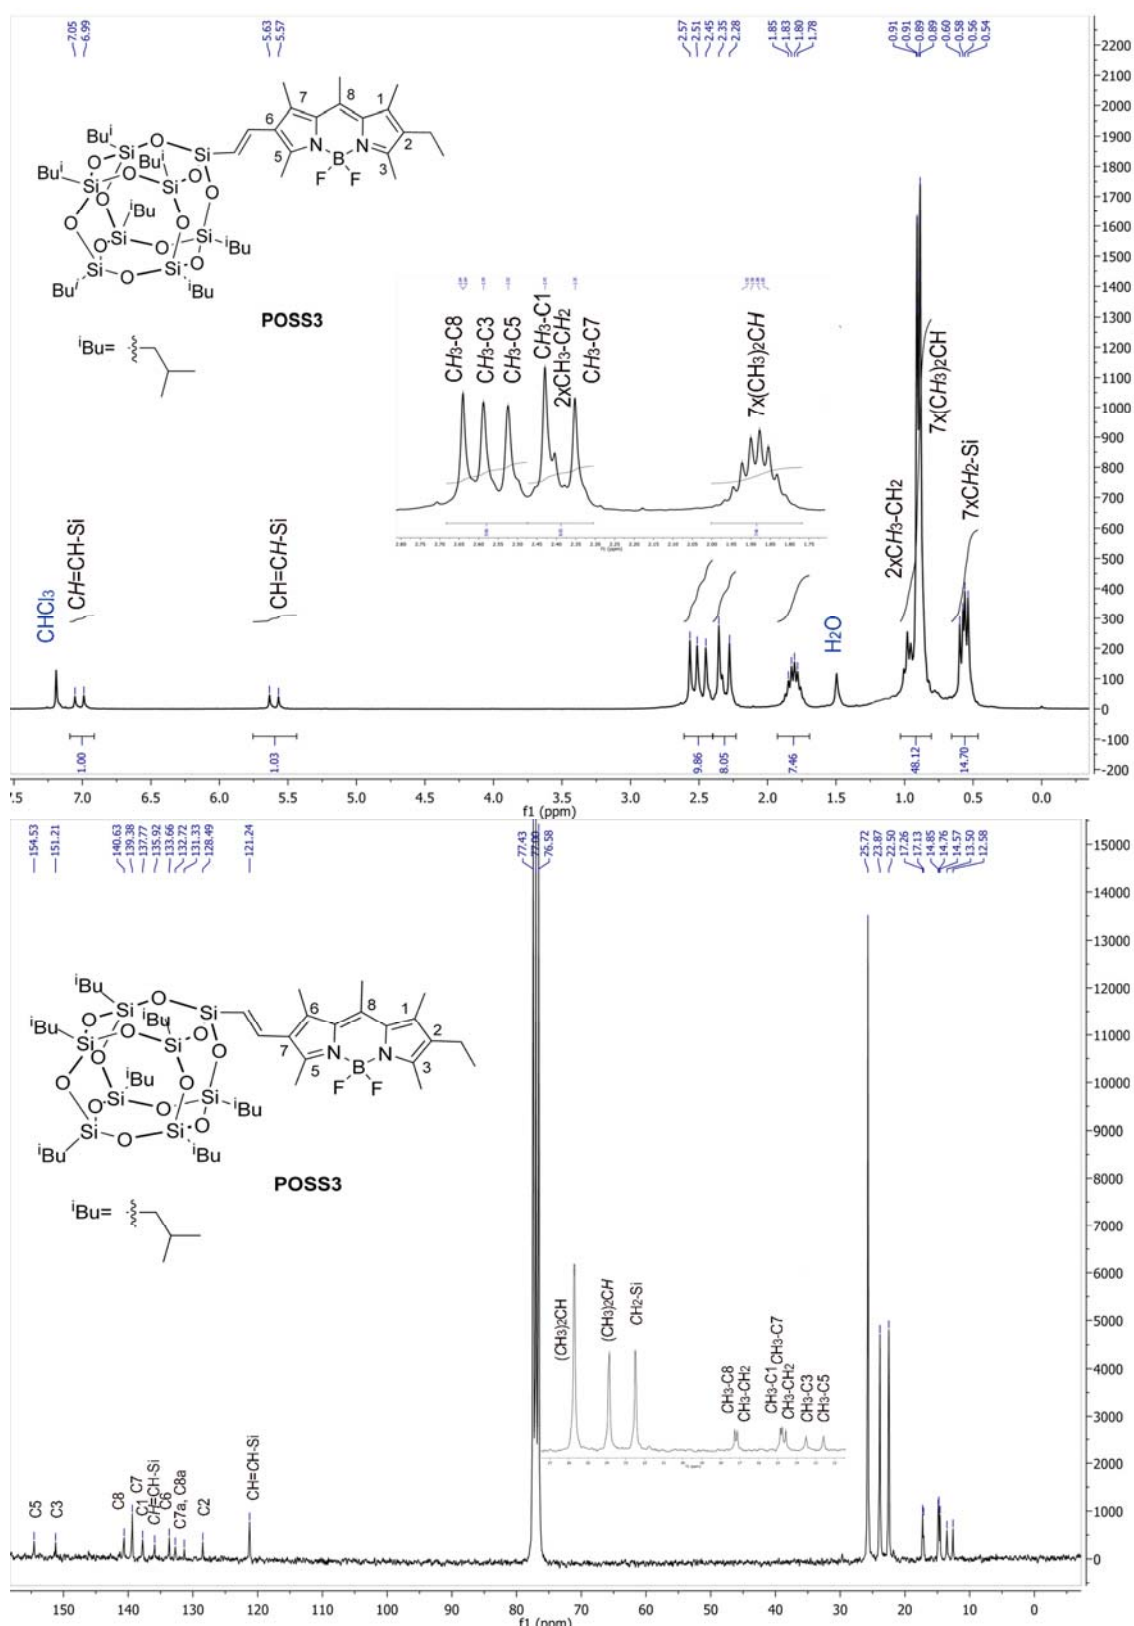

## Supplementary Information

### New BODIPY chromophores bound to polyhedral oligomeric silsesquioxanes (POSS) with improved thermo- and photostability

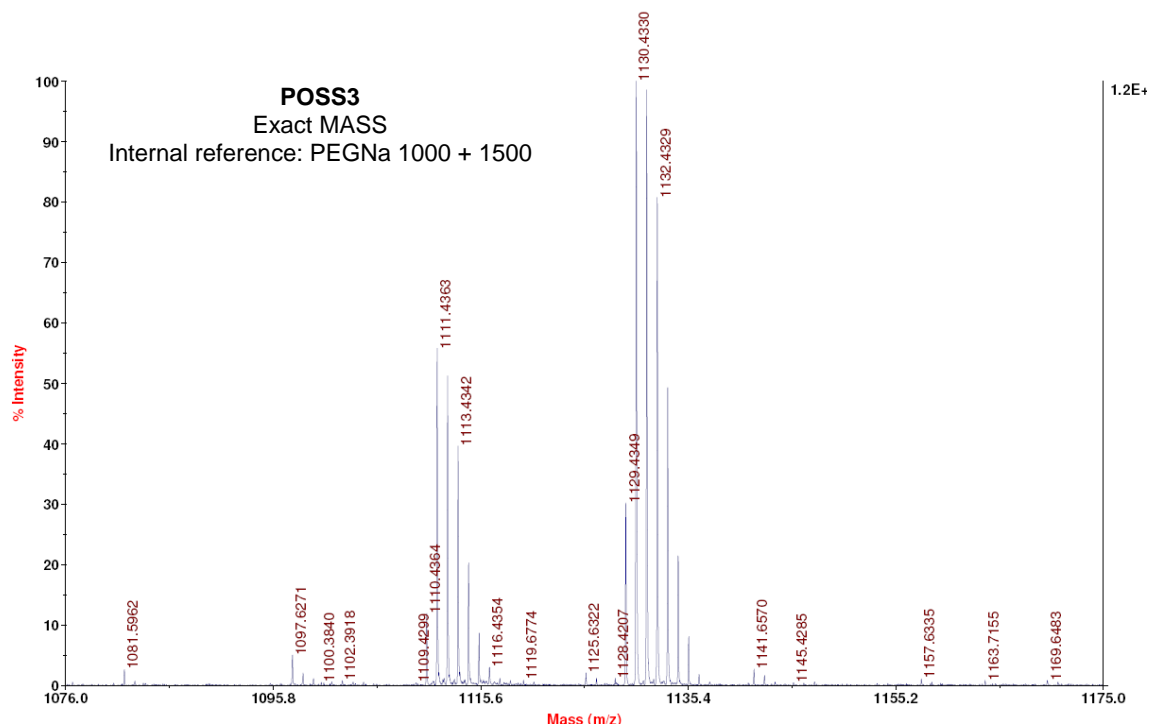

**Figure S6.** POSS3 HRMS MALDI-TOF analysis: calculated for  $C_{46}H_{85}BN_2O_{12}F_2Si_8$  1130.4312, found 1130.4330.

## Supplementary Information

New BODIPY chromophores bound to polyhedral oligomeric silsesquioxanes (POSS) with improved thermo- and photostability

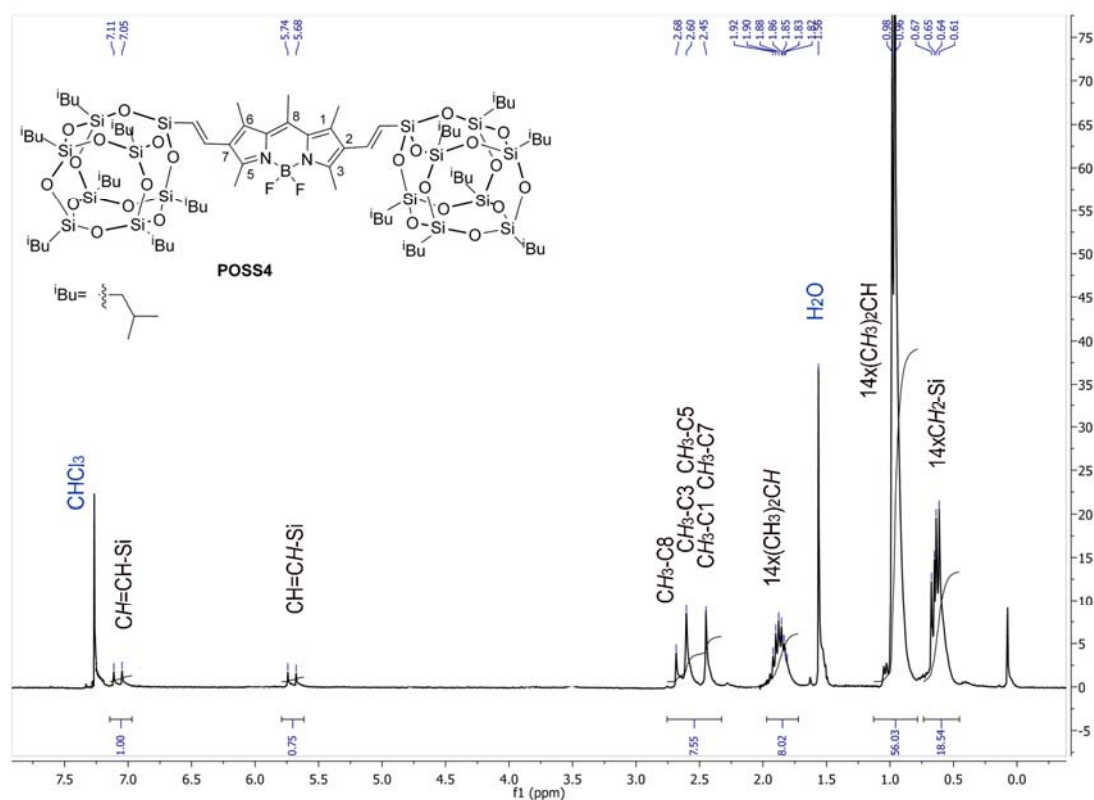

Figure S7.  $^1\text{H-NMR}$  spectra of hybrid compound POSS4

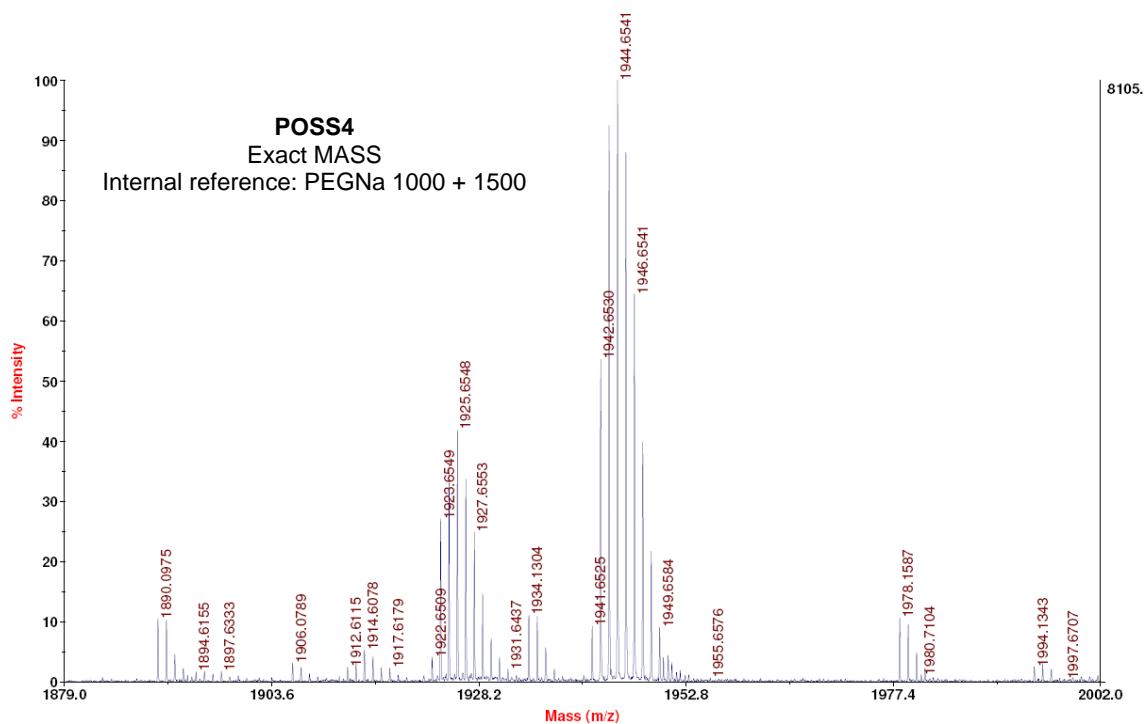

Figure S8. POSS4 HRMS MALDI-TOF analysis: calculated for  $\text{C}_{74}\text{H}_{145}\text{BN}_2\text{O}_{24}\text{F}_2\text{Si}_{16}$  1942.655, found 1942.653.
